# Supplementary material for: Programming electronic skin with diverse skin-like properties
Source: Royal Society of Chemistry journal article supplement (doi:10.1039/d0ta09101d), 2020-10-24
Supplement: d0ta09101d1.pdf [file d0ta09101d1.pdf]

## 1 Supplementary Figures:

2

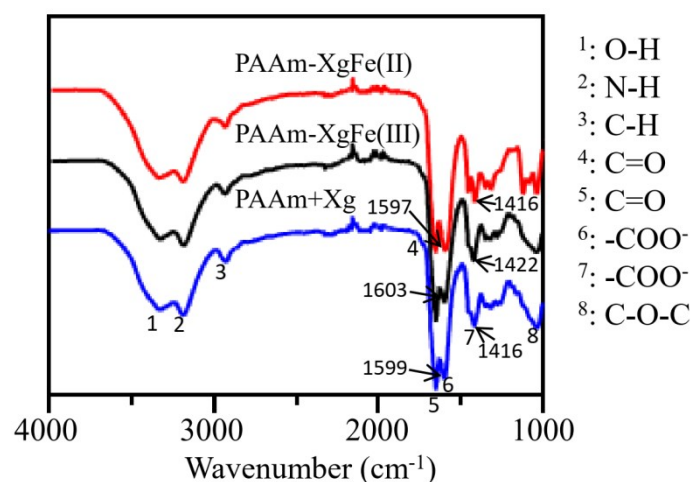

3

4 **Figure S1. The FTIR spectra.** The functional groups corresponding to the infrared  
5 absorption peaks were listed beside the figure. Of note, the asymmetric and symmetric  
6 stretching vibrations of  $\text{COO}^-$  groups were separately located at 1599  $\text{cm}^{-1}$  and 1416  $\text{cm}^{-1}$  for  
7 the PAAm+Xg (3% w/v) hydrogel, at 1603  $\text{cm}^{-1}$  and 1422  $\text{cm}^{-1}$  for the PAAm-XgFe(III)-3  
8 hydrogel, and at 1597  $\text{cm}^{-1}$  and 1416  $\text{cm}^{-1}$  for the PAAm-XgFe(II)-3 hydrogel.

9

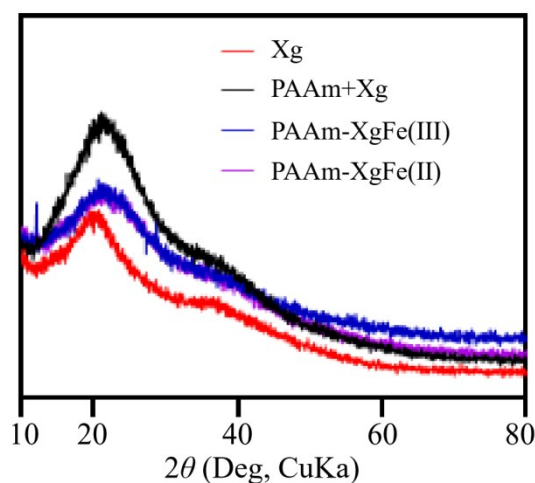

10

11 **Figure S2. The XRD measurement.** The peaks at around 20° were decreased in the PAAm-  
12 XgFe(III)-3 hydrogel and the PAAm-XgFe(II)-3 hydrogel compared with that in the  
13 PAAm+Xg (3% w/v) hydrogel. The peaks at around 38° represented the amorphous structure  
14 of xanthan gum.

15

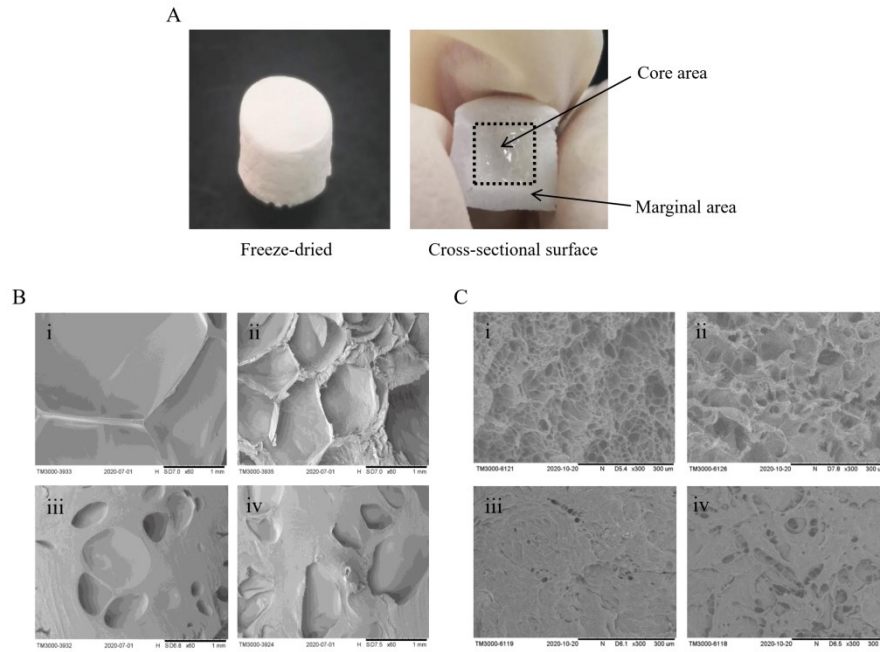

1  
 2 **Figure S3. The morphology of PAAm-based hydrogels.** (A) The general view of the  
 3 freeze-dried PAAm hydrogel and its cross-sectional surface with a clear border dividing the  
 4 core and marginal areas. (B) The SEM morphology at the core area of hydrogels. (C) The  
 5 SEM morphology at the marginal area of hydrogels. (i): PAAm hydrogel; (ii): PAAm+Xg (3%  
 6 w/v) hydrogel; (iii): the PAAm+XgFe(III)-3 hydrogel; and (iv): the PAAm+XgFe(II)-3  
 7 hydrogel.

8

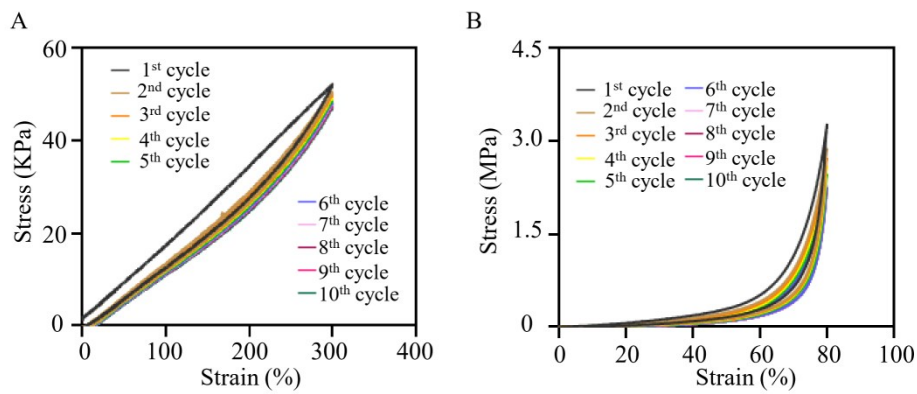

9  
 10 **Figure S4. A ten-cycle stretch-recovery measurement of the PAAm-XgFe(II)-3 hydrogel (A),**  
 11 **and a ten-cycle compression-recovery test of the PAAm-XgFe(II)-3 hydrogel (B).**

12

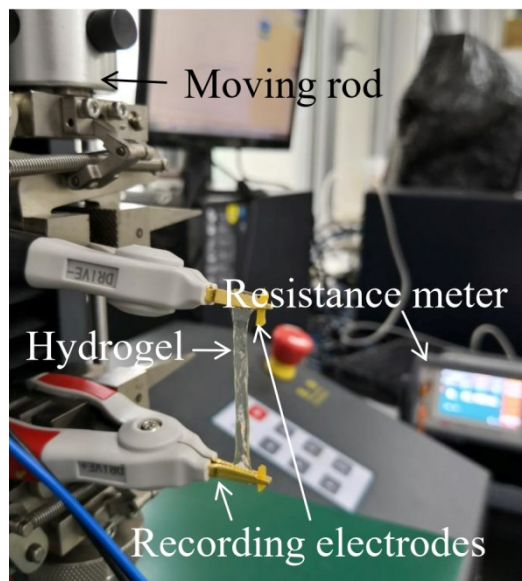

1

2 **Figure S5.** The machine assembled from an automatic resistance meter with a MTS for the  
3 detection of the electromechanical properties.

4

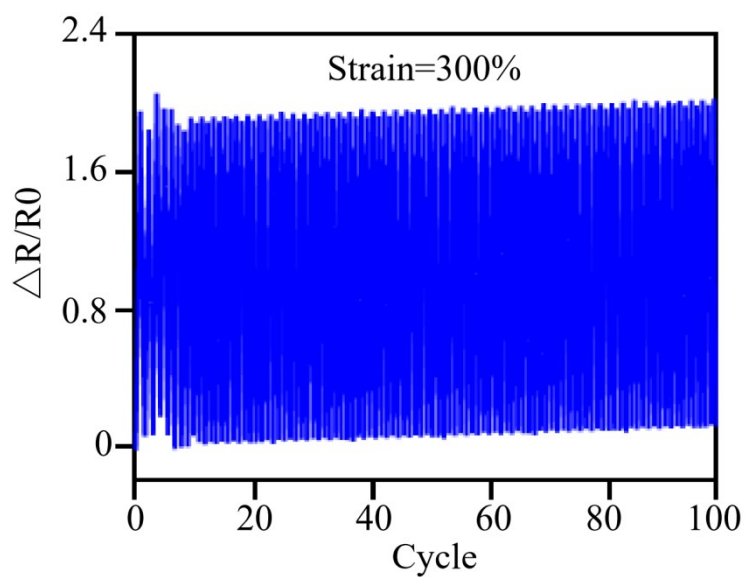

5

6 **Figure S6.** The measurement of the relative resistance change for 100 stretch-recovery cycles  
7 in the range of 0%–300% strain.

8

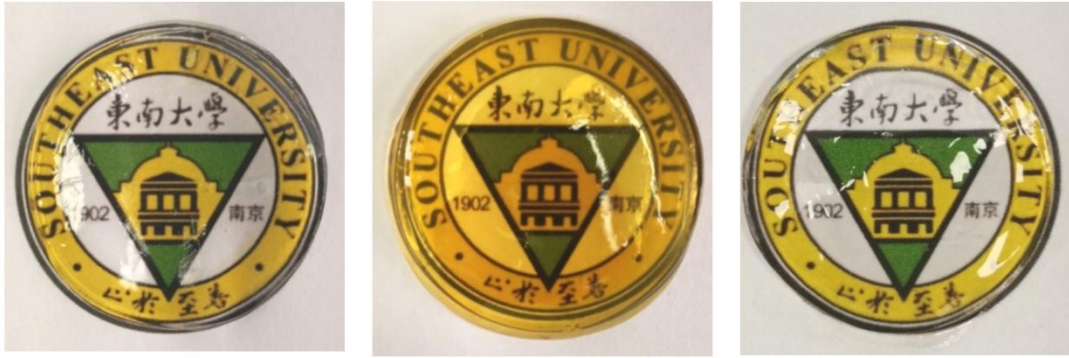

1 PAAm+Xg hydrogel PAAm-XgFe(III) hydrogel PAAm-XgFe(II) hydrogel  
 2 **Figure S7.** The light transmittance of the university badge covered with the PAAm+Xg (3%  
 3 w/v) hydrogel, the PAAm-XgFe(III)-3 hydrogel, or the PAAm-XgFe(II)-3 hydrogel.  
 4

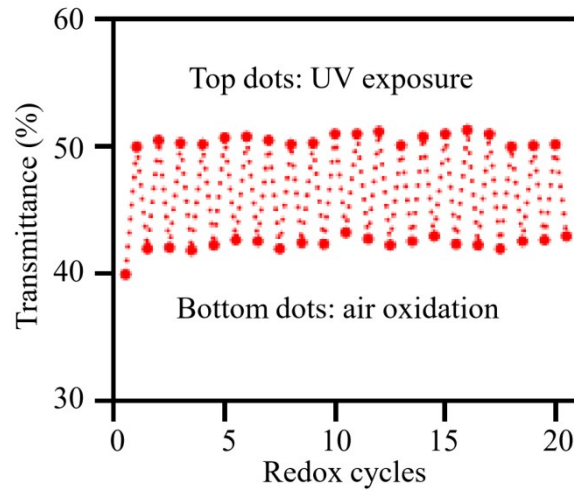

5  
 6 **Figure S8.** The light transmittance of hydrogels during the twenty cycles of the Fe(III)/Fe(II)  
 7 redox.  
 8

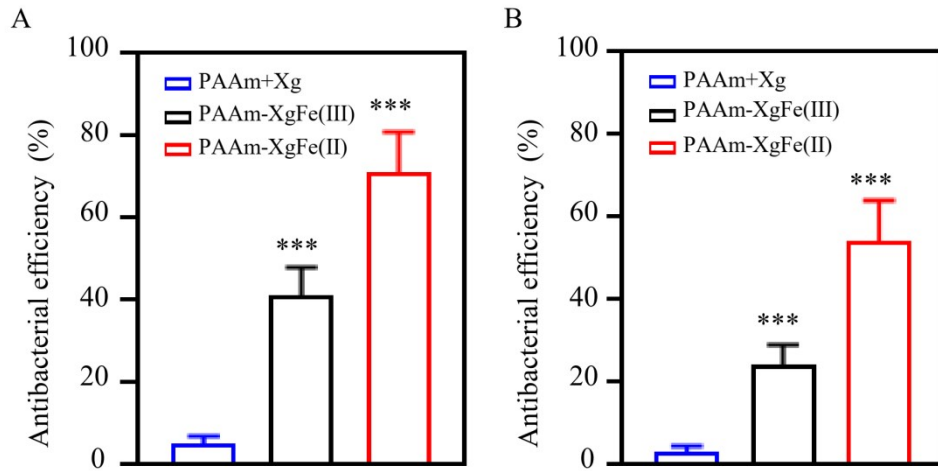

1  
 2 **Figure S9.** The antibacterial efficiency against *E. coli* (A) and *S. aureus* (B) was quantified  
 3 from the ratio of the red staining bacteria to the total of the bacteria. \*\*\*,  $P < 0.001$ , compared  
 4 with the PAAm+Xg (3% w/v) hydrogel using the Student's *t* test.

5

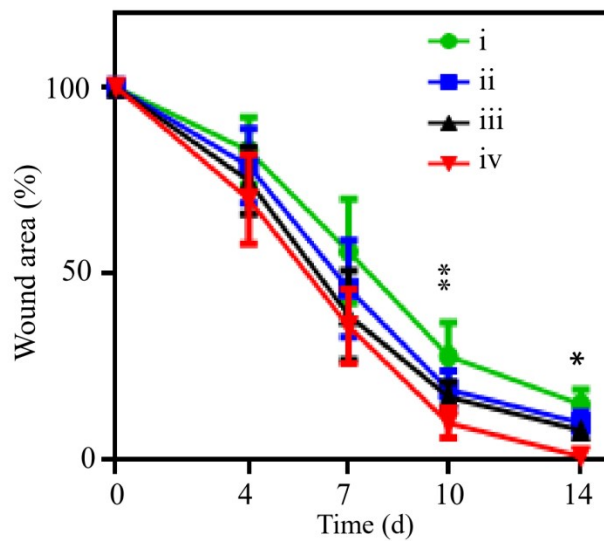

6  
 7 **Figure S10.** The percentage of wound area treated with the normal saline (i), the PAAm+Xg  
 8 (3% w/v) hydrogel (ii), the PAAm-XgFe(III)-3 hydrogel (iii), and the PAAm-XgFe(II)-3  
 9 hydrogel (iv). \*,  $P < 0.05$ ; \*\*,  $P < 0.01$ , one-way ANOVA was used for data analysis.

10

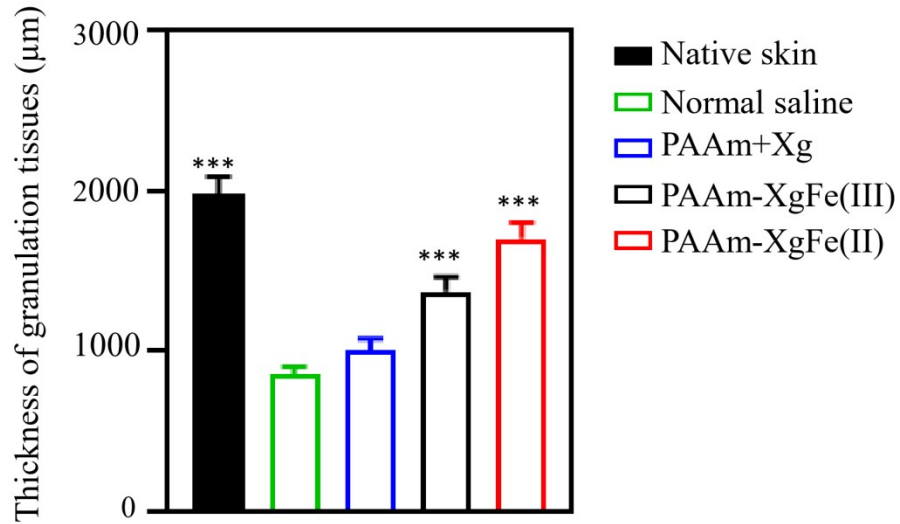

1

2 **Figure S11.** The thickness of the regenerated tissues on the 4<sup>th</sup> day. \*\*\*,  $P < 0.001$ , compared  
 3 with the infected wounds treated with normal saline using the Student's *t* test.

4

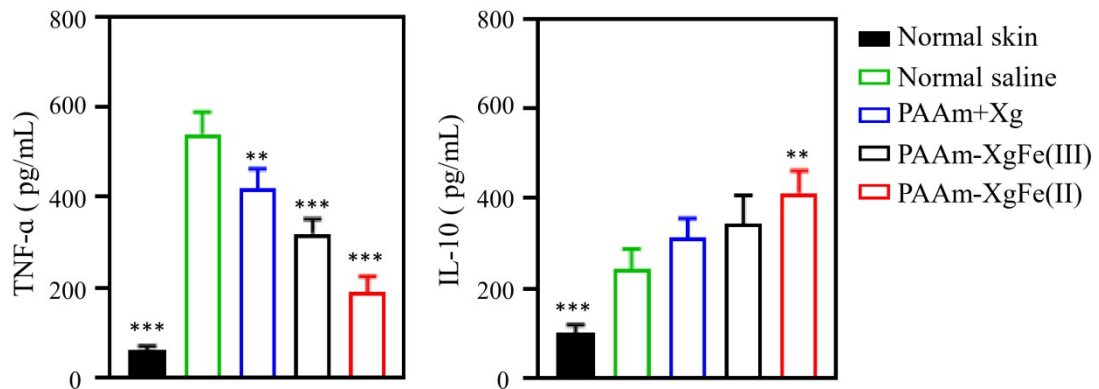

5

6 **Figure S12.** The expression of pro-inflammatory cytokines (TNF-α) and anti-inflammatory  
 7 cytokines (IL-10) in the regenerated tissues on the 4<sup>th</sup> day. \*\*,  $p < 0.01$ ; \*\*\*,  $P < 0.001$ ,  
 8 compared with the infected wounds treated with normal saline using the Student's *t* test.

9

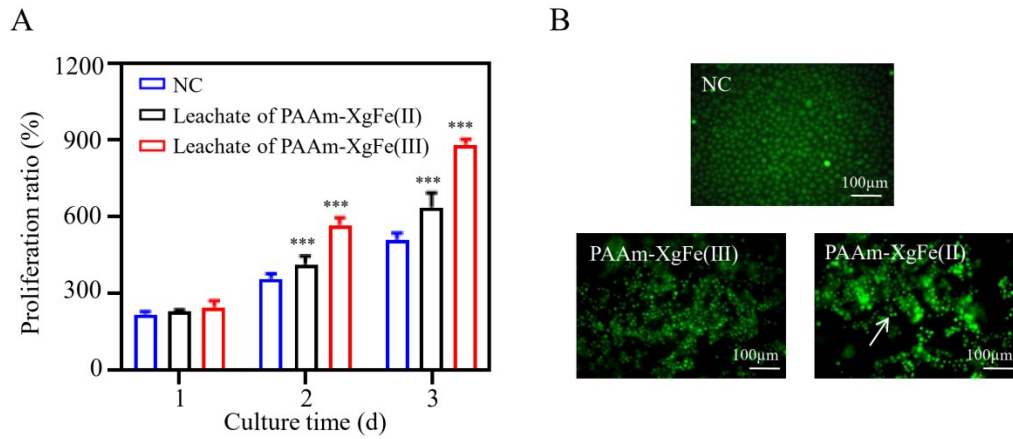

1

2 **Figure S13. The biocompatible studies.** (A) The proliferation of L929 fibroblasts in the  
 3 different DMEM media-extracted hydrogel leachates. \*\*\*,  $P < 0.001$ , compared with the  
 4 normal culture media using the Student's  $t$  test. (B) The live/dead assay of L929 fibroblasts  
 5 cultured on the hydrogel surface at day 3, which showed the good cytocompatibility of  
 6 PAAm-XgFe(III) and PAAm-XgFe(II). While arrow: very few dead cells labeled in red.

7
