# Supplementary material for: Programming electronic skin with diverse skin-like properties
Source: Royal Society of Chemistry journal article supplement (doi:10.1039/d0ta09101d), 2020-10-24
Supplement: d0ta09101d2.pdf [file d0ta09101d2.pdf]

**Table S1.** Comparison of the e-skin properties in this work with those in other publications.

| Composition                                                                                                         | The properties of the native skin |              |              |                     |                       |                 | Reference |
|---------------------------------------------------------------------------------------------------------------------|-----------------------------------|--------------|--------------|---------------------|-----------------------|-----------------|-----------|
|                                                                                                                     | Strain detection                  | Antibacteria | UV-sensitive | Optical Variability | Shape customizability | Immune function |           |
| Silver nanowire, PLGA fibers + PVA fibers                                                                           | ✓                                 | ✓            | -            | -                   | -                     | -               | [1]       |
| PAAm + cellulose+ Na <sub>2</sub> SO <sub>4</sub>                                                                   | ✓                                 | -            | -            | ✓                   | -                     | -               | [2]       |
| PVA/PAMAA + NaCl + glycerol                                                                                         | ✓                                 | -            | -            | -                   | -                     | -               | [3]       |
| Silver flake, silver plate, and EGAIn as metallic fillers + elastomer                                               | ✓                                 | -            | -            | ✓                   | -                     | -               | [4]       |
| PMMA + multiwalled carbon nanotubes (MVCNTs)                                                                        | ✓                                 | -            | -            | -                   | ✓                     | -               | [5]       |
| PEDOT:PSS + cellulose nanofibril paper                                                                              | ✓                                 | -            | -            | -                   | ✓                     | -               | [6]       |
| Metal oxide nanofiber network + elastomer                                                                           | ✓                                 | -            | ✓            | -                   | -                     | -               | [7]       |
| Graphene + PVA + polydopamine + silver nanoparticles                                                                | ✓                                 | ✓            | -            | -                   | -                     | -               | [8]       |
| Bio-electrochemical liquid bridge (RC-LH1 protein, potassium ferrocyanide, and potassium ferricyanide) + electrodes | ✓                                 | -            | ✓            | -                   | -                     | -               | [9]       |
| Silver + PVDF-TrFE:ZnO + quantum dots + hole transport layer + ITO/PET                                              | ✓                                 | -            | -            | ✓                   | -                     | -               | [10]      |

|                      |   |   |   |   |   |   |                  |
|----------------------|---|---|---|---|---|---|------------------|
| PAAm-XgFe(III, II)-3 | ✓ | ✓ | ✓ | ✓ | ✓ | ✓ | <b>This work</b> |
|----------------------|---|---|---|---|---|---|------------------|

### Supplementary references:

- [1] Peng X, Dong K, Ye C, et al. A breathable, biodegradable, antibacterial, and self-powered electronic skin based on all-nanofiber triboelectric nanogenerators. *SCI ADV* 2020;6:a9624.
- [2] Chen C, Wang Y, Wu Q, et al. Highly strong and flexible composite hydrogel reinforced by aligned wood cellulose skeleton via alkali treatment for muscle-like sensors. *CHEM ENG J* 2020;400:125876.
- [3] Huang J, Peng S, Gu J, et al. Self-powered integrated system of a strain sensor and flexible all-solid-state supercapacitor by using a high performance ionic organohydrogel. *MATER HORIZ* 2020;7:2085-2096.
- [4] Lee J, Sul H, Jung Y, et al. Thermally Controlled, Active Imperceptible Artificial Skin in Visible-to-Infrared Range. *ADV FUNCT MATER* 2020;n/a:2003328.
- [5] Chen D, Liu Z, Li Y, et al. Unsymmetrical Alveolate PMMA/MWCNT Film as a Piezoresistive E-Skin with Four-Dimensional Resolution and Application for Detecting Motion Direction and Airflow Rate. *ACS Appl Mater Interfaces* 2020;12:30896-30904.
- [6] Ling H, Chen R, Huang Q, et al. Transparent, flexible and recyclable nanopaper-based touch sensors fabricated via inkjet-printing. *GREEN CHEM* 2020;22:3208-3215.
- [7] Wang B, Thukral A, Xie Z, et al. Flexible and stretchable metal oxide nanofiber networks for multimodal and monolithically integrated wearable electronics. *NAT COMMUN* 2020;11:2405.
- [8] Fan L, Xie J, Zheng Y, et al. Antibacterial, Self-Adhesive, Recyclable, and Tough Conductive Composite Hydrogels for Ultrasensitive Strain Sensing. *ACS Appl Mater Interfaces* 2020;12:22225-22236.
- [9] Ravi SK, Paul N, Suresh L, et al. Bio-photocapacitive tactile sensors as a touch-to-audio braille reader and solar capacitor. *MATER HORIZ* 2020;7:866-876.
- [10] Hu H, Shen T, Lin T, Chen Y. Interactive Color-Changing Electronic Skin Based on Flexible and Piezoelectrically Tunable Quantum Dots Light-Emitting Diodes. *ADV OPT MATER* 2020;8:1901715.
