# Supplementary material for: Programming electronic skin with diverse skin-like properties
Source: Royal Society of Chemistry journal article supplement (doi:10.1039/d0ta09101d), 2020-10-24
Supplement: d0ta09101d3.pdf [file d0ta09101d3.pdf]

**Table S2.** The compositions of PAAm-XgFe hydrogel e-skin with different weight of Xg.

|                  | <b>AAm<br/>(%w/v)</b> | <b>MBA<br/>(%w/v)</b> | <b>I-2959<br/>(%w/v)</b> | <b>Xg<br/>(%w/v)</b> | <b>Fe(III)<br/>(%w/v)</b> | <b>Fe(III) after dialysis<br/>(%w/v) (n=3)</b> |
|------------------|-----------------------|-----------------------|--------------------------|----------------------|---------------------------|------------------------------------------------|
| PAAm-XgFe(III)-0 | 14                    | 0.07                  | 0.5                      | 0                    | 2.4                       | $(3.40 \pm 0.11) * 10^{-2}$                    |
| PAAm-XgFe(III)-1 | 14                    | 0.07                  | 0.5                      | 1                    | 2.4                       | $(3.64 \pm 0.18) * 10^{-2}$                    |
| PAAm-XgFe(III)-3 | 14                    | 0.07                  | 0.5                      | 3                    | 2.4                       | $(4.01 \pm 0.14) * 10^{-2}$                    |
| PAAm-XgFe(III)-5 | 14                    | 0.07                  | 0.5                      | 5                    | 2.4                       | $(4.31 \pm 0.16) * 10^{-2}$                    |
| PAAm-XgFe(III)-7 | 14                    | 0.07                  | 0.5                      | 7                    | 2.4                       | $(4.54 \pm 0.10) * 10^{-2}$                    |
