# Supplementary material for: Programming electronic skin with diverse skin-like properties
Source: Royal Society of Chemistry journal article supplement (doi:10.1039/d0ta09101d), 2020-10-24
Supplement: d0ta09101d4.pdf [file d0ta09101d4.pdf]

**Table S3.** The primer sequences of mRNA.

| <b>Gene</b>   | <b>Forward</b>         | <b>Reverse</b>         |
|---------------|------------------------|------------------------|
| iNOS          | AGAGCCACAGTCCTCTTTGC   | CTGGTCCATGCAGACAACCT   |
| IL-1 $\beta$  | ACTCAACTGTGAAATGCCACC  | CAAAGGTTTGAAGCAGCCC    |
| TNF- $\alpha$ | CCCTCACACTCACAAACCAC   | ACAAGGTACAACCCATCGGC   |
| IL-10         | GGCCAGAAATCAAGGAGCA    | AGAAATCGATGACAGCGCCT   |
| TGF- $\beta$  | CTGCTGACCCCCACTGATAC   | AGCCCTGTATTCCGTCTCCT   |
| PDGF          | AGATCGCTGTACGATCGGC    | TCGGAGTCATCGTCCGAAAG   |
| GAPDH         | GAAGGTGGTGAAGCAGGCATCT | CGGCATCGAAGGTGGAAGAGTG |
